# Supplementary material for: Taliglucerase Alfa Modulates Aβ Load and Autophagy-Related Pathways in Mouse Hippocampal Neurons Exposed to oAβ1-42
Source: Research Square preprint supplement (doi:10.21203/rs.3.rs-7094261/v1), 2025-08-04
Supplement: Supplementary file 1 [file e954208c9d4536453ab95f2d.docx]

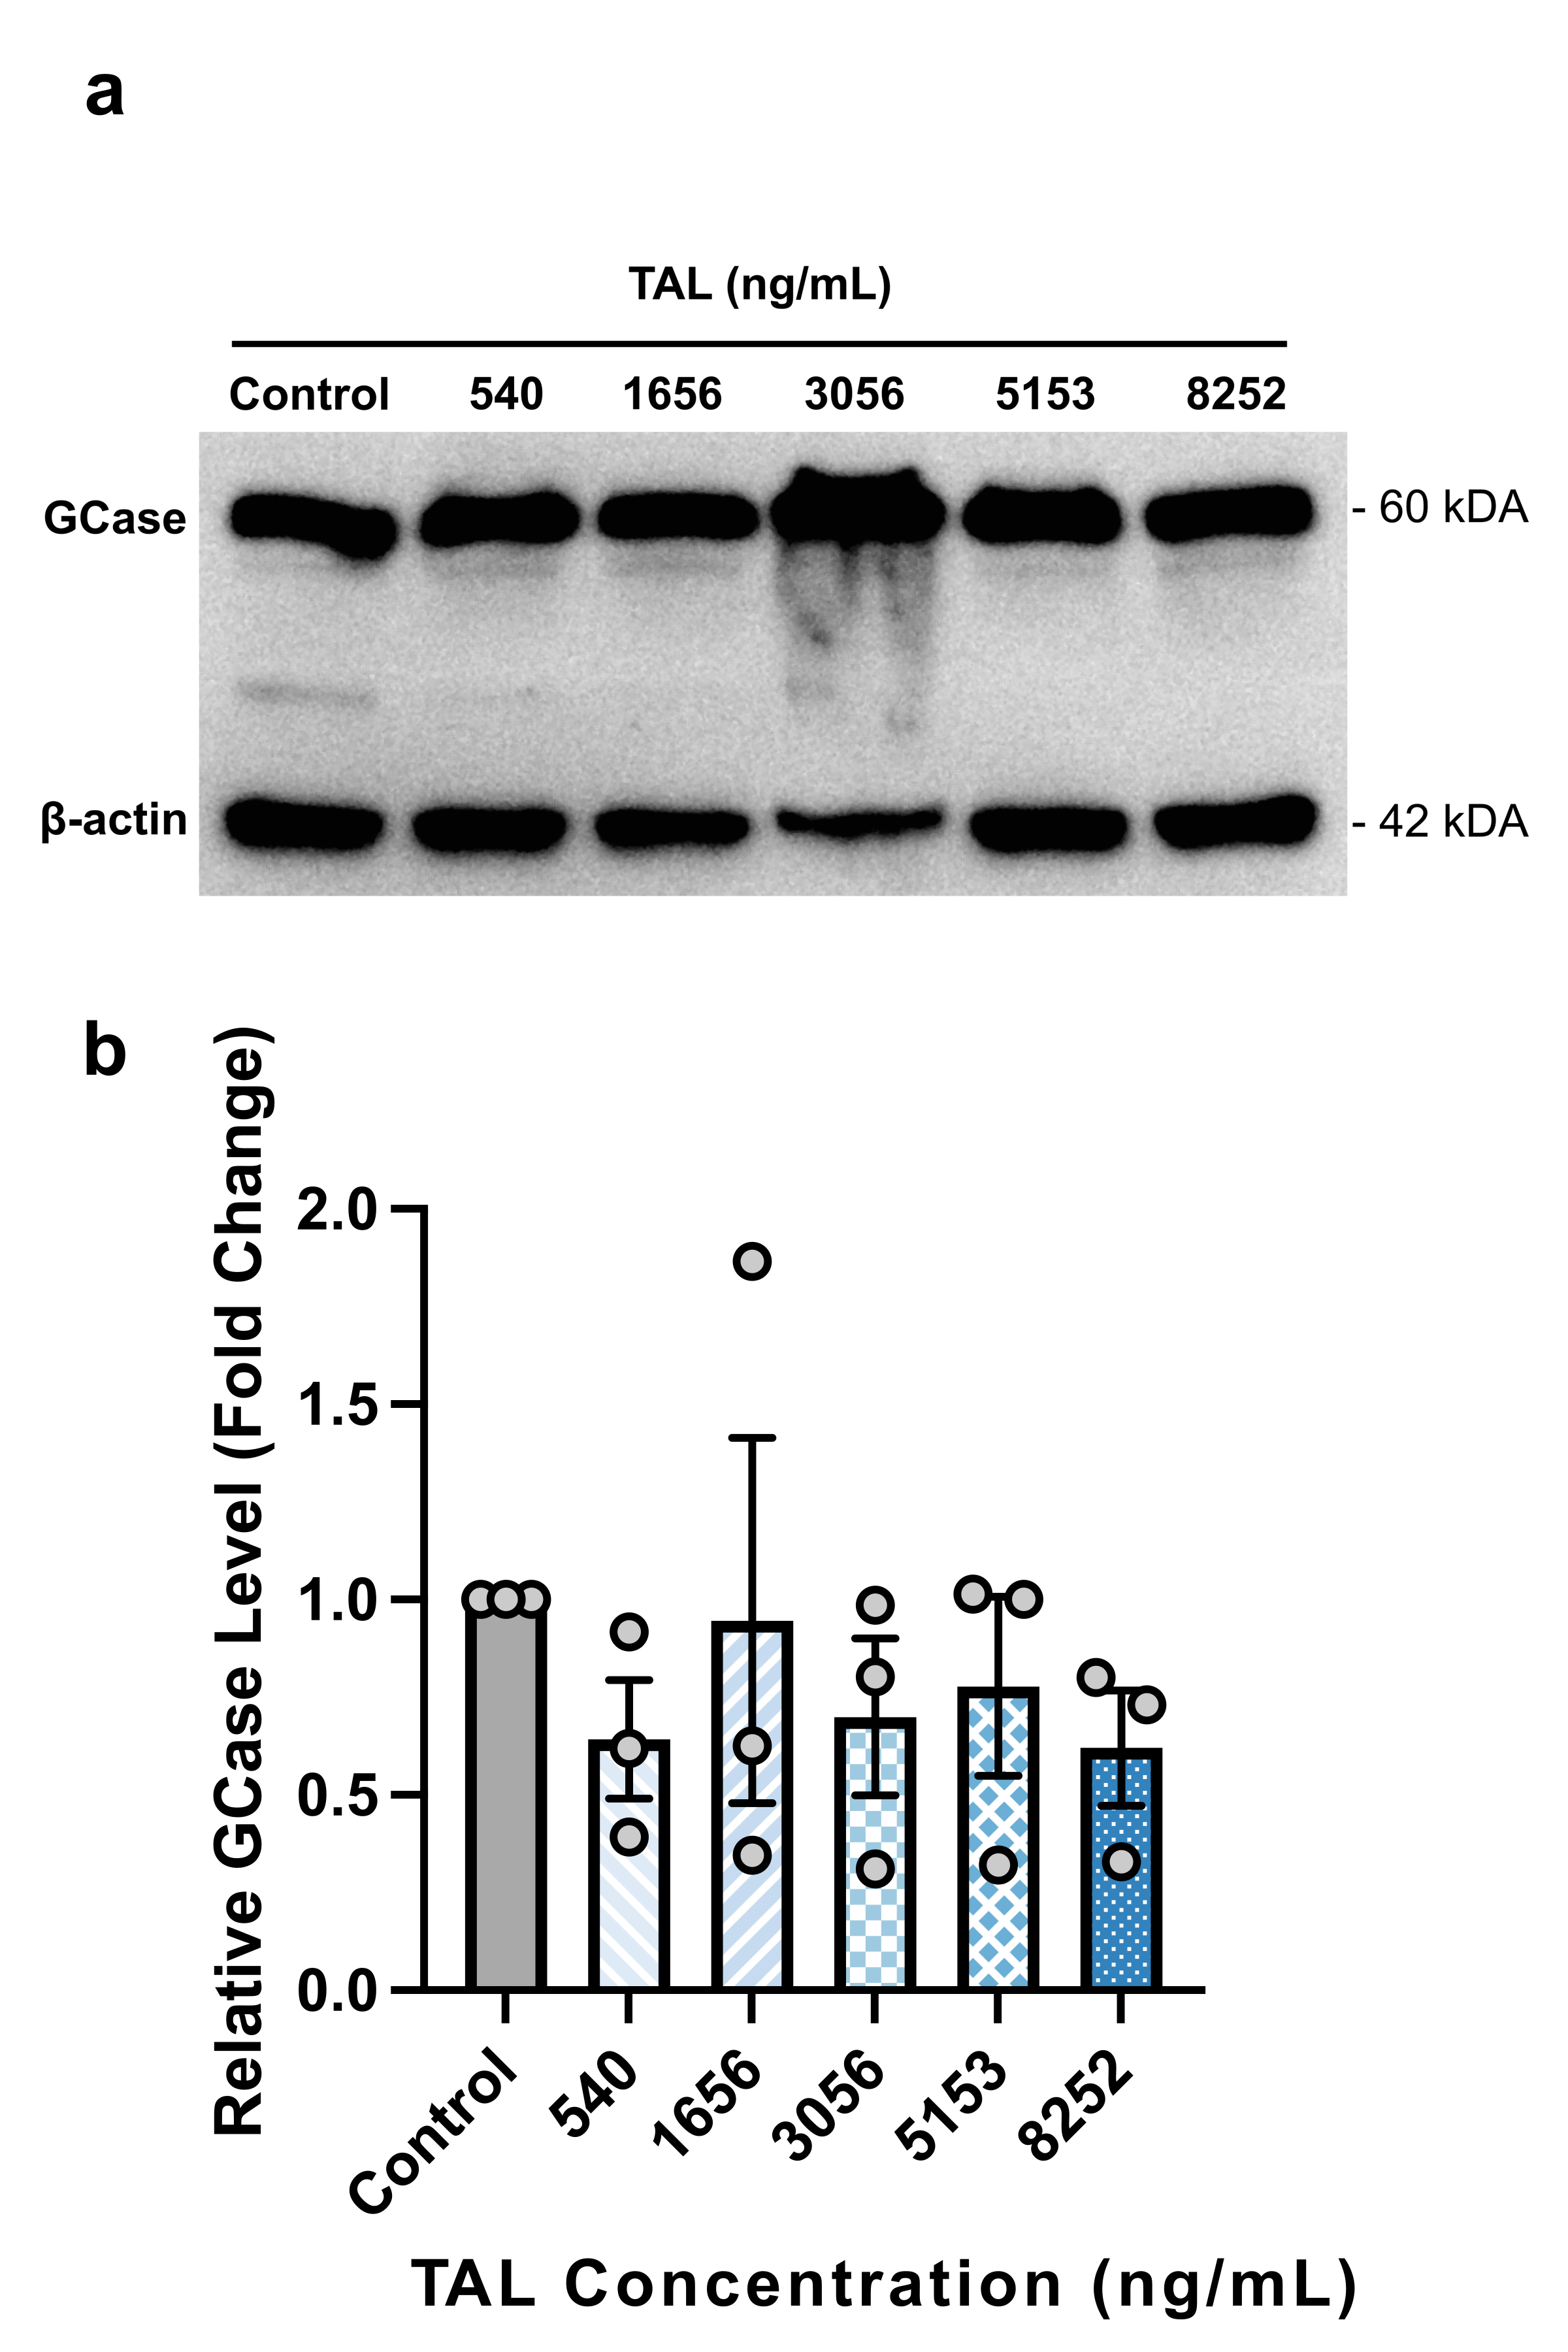


**Online Resource 1 Increasing concentrations of Taliglucerase alfa (TAL) do not alter total GCase protein levels in HT-22 cells.** HT-22 cells were treated for 32 hours with the indicated concentrations of TAL. (a) Representative Western blot showing GCase (~60 kDa) and the loading control β-actin (~42 kDa) in total cell lysates. (b) Densitometric analysis of GCase levels, normalized to β-actin. Data are expressed as fold change relative to the control group and are presented as mean ± SEM (n=3). A one-way ANOVA confirmed no significant differences among the treatment groups (F(5,12) = 0.4272, p = 0.8212)
